# Supplementary material for: Downregulation of Exosomal hsa-miR-551b-3p in Obesity and Its Link to Type 2 Diabetes Mellitus
Source: MDPI journal article supplement (doi:10.3390/ncrna9060067), 2023-11-02
Supplement: s1 [file s1]

Table S1. Primers for miRNA detection using reverse transcription and real time PCR.

| microRNA        | Specific RT-primer and PCR reverse primer                                                          |
|-----------------|----------------------------------------------------------------------------------------------------|
| hsa-miR-551b-3p | RT_primer 5'-TGGCATTGATCTGGTTCATCAAGGCCTTGCGACCCATAAAACCAAG-3'<br>REV: 5'-AAACCAAGTATGGGTTCGC-3'   |
| hsa-miR-302d-3p | RT_primer 5'-TGGCATTGATCTGGTTCATCAAGGCCTTACTTTAACATGTGCCTCC-3'<br>REV: 5'-CATGTGCCTCCATGTTAAAGT-3' |
| hsa-miR-145-5p  | RT_primer 5'-TGGCATTGATCTGGTTCATCAAGGCCTTGTCAGTTTTTTCCTGGG-3'<br>REV: 5'-TTCCTGGGAAACTGGAC-3'      |
| hsa-miR-132-3p  | RT_primer 5'-TGGCATTGATCTGGTTCATCAAGGCCTTACCGTGGCTTACAATCGA-3'<br>REV: 5'-AACAATCGAAAGCCACGGT-3'   |
| hsa-miR-10a-5p  | RT_primer 5'-TGGCATTGATCTGGTTCATCAAGGCCTTTACCCTGTAGATTCGGAT-3'<br>REV: 5'-GATTCGGATCTACAGGGTA-3'   |
| hsa-miR-1246    | RT_primer 5'-TGGCATTGATCTGGTTCATCAAGGCCTTAATGGATTTTCTGCTCCA-3'<br>REV: 5'-TTCTGCTCCAAAAATCCATT-3'  |
| hsa-miR-378g-3p | RT_primer 5'-TGGCATTGATCTGGTTCATCAAGGCCTTACUGGGCUUGTCTGACTC-3'<br>REV: 5'-GTCTGACTCCAAGCCCAGT-3'   |
| hsa-let-7c-5p   | RT_primer 5'TGGCATTGATCTGGTTCATCAAGGCCTTTGAGGTAGTAGCATACAAC-3'<br>REV: 5'-GCATACAACCTACTACCTCA-3'  |

|                     |         |                            |
|---------------------|---------|----------------------------|
| Universal<br>primer | forward | 5'-TGGCATTGATCTGGTTCATC-3' |
|---------------------|---------|----------------------------|
